# Supplementary material for: A case-only study to identify genetic modifiers of breast cancer risk for BRCA1/BRCA2 mutation carriers
Source: PubMed Central journal article supplement (PMC7890067; doi:10.1038/s41467-020-20496-3), 2021-02-17
Supplement: 41467_2020_20496_MOESM1_ESM.pdf [file 41467_2020_20496_MOESM1_ESM.pdf]

## Supplementary Information PDF

« A case-only study to identify genetic modifiers of breast cancer risk for *BRCA1/BRCA2* mutation carriers » , Coignard *et al.*

# Supplementary information

## Supplementary tables

Supplementary table 1- Participating studies from CIMBA

Supplementary table 2- Participating studies from BCAC

Supplementary Table 3- Number of case subjects per country and study

Supplementary Table 4- Number of control subjects per country and study

## Supplementary figures

Supplementary figure 1- Heterogeneity in the SNP associations by country for the SNPs found to be associated with *BRCA1* mutation status

Supplementary figure 2- Sensitivity analysis for the SNPs showing associations with *BRCA1* mutation status in the case only analysis

Supplementary figure 3- Heterogeneity in the SNP associations by country for the SNPs found to be associated with *BRCA2* mutation status

Supplementary figure 4- Sensitivity analysis for the SNPs showing associations with *BRCA2* mutation status in the case only analysis

Supplementary figure 5- Impact of the control-only analysis on the case-only analysis results

**Supplementary table 1- Participating studies from CIMBA**

| <b>Study Acronym</b> | <b>Study Name</b>                                                                 | <b>Country</b>            |
|----------------------|-----------------------------------------------------------------------------------|---------------------------|
| BCFR-AU              | Australian site of the Breast Cancer Family Registry                              | Australia                 |
| KCONFAB              | Kathleen Cuningham Consortium for Research into Familial Breast Cancer            | Australia                 |
| VFCTG                | Victorian Familial Cancer Trials Group                                            | Australia                 |
| G-FAST               | Ghent University Hospital                                                         | Belgium                   |
| BCFR-ON/OCGN         | Ontario site of the Breast Cancer Family Registry/Ontario Cancer Genetics Network | Canada                    |
| INHERIT              | INterdisciplinary HEalth Research Internal Team BReast CANcer susceptibility      | Canada (Quebec)           |
| MCGILL               | McGill University                                                                 | Canada (Quebec)           |
| CBCS                 | Copenhagen Breast Cancer Study                                                    | Denmark                   |
| OUH                  | Odense University Hospital                                                        | Denmark                   |
| HEBCS                | Helsinki Breast Cancer Study                                                      | Finland                   |
| GEMO                 | Genetic Modifiers of cancer risk in BRCA1/2 mutation carriers                     | France/USA                |
| GC-HBOC              | German Familial Breast Group                                                      | Germany                   |
| DKFZ                 | German Cancer Research Center                                                     | Germany/Pakistan/Colombia |
| DEMOKRITOS           | National Centre for Scientific Research Demokritos                                | Greece                    |
| SMC                  | Sheba Medical Centre                                                              | Israel                    |
| CONSTIT TEAM         | CONSORZIO STUDI ITALIANI SUI TUMORI EREDITARI ALLA MAMMELLA                       | Italy                     |
| IOVHBOCS             | Istituto Oncologico Veneto                                                        | Italy                     |
| PBCS                 | Università di Pisa                                                                | Italy                     |
| HEBON                | Hereditary Breast and Ovarian cancer study the Netherlands                        | Netherlands               |
| IHCC                 | International Hereditary Cancer Centre                                            | Poland                    |
| NNPIO                | N.N. Petrov Institute of Oncology                                                 | Russia                    |
| CNIO                 | Spanish National Cancer Centre                                                    | Spain                     |
| FPGMX                | Fundación Pública Galega de Medicina Xenómica                                     | Spain                     |
| HCSC                 | Hospital Clinico San Carlos                                                       | Spain                     |
| HVH                  | University Hospital Vall d'Hebron                                                 | Spain                     |
| ICO                  | Institut Català d'Oncologia                                                       | Spain                     |
| SWE-BRCA             | Swedish Breast Cancer Study                                                       | Sweden                    |
| EMBRACE              | Epidemiological Study of Familial Breast Cancer                                   | UK                        |
| UKGRFOCR             | UK and Gilda Radner Familial Ovarian Cancer Registries                            | UK/USA                    |

|              |                                                               |               |
|--------------|---------------------------------------------------------------|---------------|
| BCFR-NC      | Northern California site of the Breast Cancer Family Registry | USA           |
| BCFR-NY      | New York site of the Breast Cancer Family Registry            | USA           |
| BCFR-PA      | Philadelphia site of the Breast Cancer Family Registry        | USA           |
| BCFR-UT      | Utah site of the Breast Cancer Family Registry                | USA           |
| BIDMC        | Beth Israel Deaconess Medical Center                          | USA           |
| BRICOH       | Beckman Research Institute of the City of Hope                | USA           |
| COH          | City of Hope Cancer Center                                    | USA           |
| DFCI         | Dana Farber Cancer Institute                                  | USA           |
| FCCC         | Fox Chase Cancer Center                                       | USA           |
| GEORGETOWN   | Georgetown University                                         | USA           |
| KUMC         | University of Kansas Medical Center                           | USA           |
| MAYO         | Mayo Clinic                                                   | USA           |
| MSKCC        | Memorial Sloane Kettering Cancer Center                       | USA           |
| NCI          | National Cancer Institute                                     | USA           |
| NORTSHORE    | NorthShore University HealthSystem                            | USA           |
| OSU CCG      | The Ohio State University Comprehensive Cancer Center         | USA           |
| UCHICAGO     | University of Chicago                                         | USA           |
| UCSF         | University of California San Francisco                        | USA           |
| UPENN        | University of Pennsylvania                                    | USA           |
| UPITT        | Cancer Family Registry University of Pittsburg                | USA           |
| UTMDACC      | University of Texas MD Anderson Cancer Center                 | USA           |
| WCP          | Women's Cancer Program at Cedars-Sinai Medical Center         | USA           |
| NRG_ONCOLOGY | NRG Oncology                                                  | USA/Australia |

**Supplementary table 2- Participating studies from BCAC**

| Study Acronym | Study Name                                                                                                                                             | Country   | Included in the analysis |              |
|---------------|--------------------------------------------------------------------------------------------------------------------------------------------------------|-----------|--------------------------|--------------|
|               |                                                                                                                                                        |           | Case-only                | Control-only |
| ABCFS         | Australian Breast Cancer Family Study                                                                                                                  | Australia | yes                      | yes          |
| ABCTB         | Australian Breast Cancer Tissue Bank                                                                                                                   | Australia | yes                      | yes          |
| BCEES         | Breast Cancer Employment and Environment Study                                                                                                         | Australia | yes                      | yes          |
| MCCS          | Melbourne Collaborative Cohort Study                                                                                                                   | Australia | yes                      | yes          |
| LMBC          | Leuven Multidisciplinary Breast Centre                                                                                                                 | Belgium   | yes                      | yes          |
| CBCS          | Canadian Breast Cancer Study                                                                                                                           | Canada    | yes                      | yes          |
| MTLGEBCS      | Montreal Gene-Environment Breast Cancer Study                                                                                                          | Canada    | yes                      | yes          |
| OFBCR         | Ontario Familial Breast Cancer Registry                                                                                                                | Canada    | yes                      | yes          |
| CGPS          | Copenhagen General Population Study                                                                                                                    | Denmark   | yes                      | yes          |
| HEBCS         | Helsinki Breast Cancer Study                                                                                                                           | Finland   | yes                      | yes          |
| KBCP          | Kuopio Breast Cancer Project                                                                                                                           | Finland   | yes                      | yes          |
| CECILE        | CECILE Breast Cancer Study                                                                                                                             | France    | yes                      | yes          |
| BBCC          | Bavarian Breast Cancer Cases and Controls                                                                                                              | Germany   | yes                      | yes          |
| BSUCH         | Breast Cancer Study of the University of Heidelberg                                                                                                    | Germany   | yes                      | yes          |
| ESTHER        | ESTHER Breast Cancer Study                                                                                                                             | Germany   | yes                      | yes          |
| GC-HBOC       | German Consortium for Hereditary Breast & Ovarian Cancer                                                                                               | Germany   | yes                      | yes          |
| GENICA        | Gene Environment Interaction and Breast Cancer in Germany                                                                                              | Germany   | yes                      | yes          |
| GEPARSIXTO    | A randomized phase II trial investigating the addition of carboplatin to neoadjuvant therapy for triple-negative and HER2-positive early breast cancer | Germany   | no                       | no           |
| GESBC         | Genetic Epidemiology Study of Breast Cancer by Age 50                                                                                                  | Germany   | yes                      | yes          |
| HABCS         | Hannover Breast Cancer Study                                                                                                                           | Germany   | yes                      | yes          |
| MARIE         | Mammary Carcinoma Risk Factor Investigation                                                                                                            | Germany   | yes                      | yes          |
| PREFACE       | Evaluation of Predictive Factors regarding the Effectivity of Aromatase Inhibitor Therapy                                                              | Germany   | no                       | no           |
| SKKDKFZS      | Städtisches Klinikum Karlsruhe Deutsches Krebsforschungszentrum Study                                                                                  | Germany   | yes                      | no           |
| SUCCESSB      | Simultaneous Study of Gemcitabine-Docetaxel Combination adjuvant treatment                                                                             | Germany   | no                       | no           |
| SUCCESSC      | Simultaneous Study of Docetaxel Based Anthracycline Free Adjuvant Treatment Evaluation                                                                 | Germany   | no                       | no           |
| CCGP          | Crete Cancer Genetics Program                                                                                                                          | Greece    | yes                      | yes          |
| BCINIS        | Breast Cancer In Northern Israel Study                                                                                                                 | Israel    | yes                      | yes          |

|             |                                                                                          |             |     |     |
|-------------|------------------------------------------------------------------------------------------|-------------|-----|-----|
| MBCSG       | Milan Breast Cancer Study Group                                                          | Italy       | yes | yes |
| ABCS        | Amsterdam Breast Cancer Study                                                            | Netherlands | yes | yes |
| ORIGO       | Leiden University Medical Centre Breast Cancer Study                                     | Netherlands | yes | yes |
| RBCS        | Rotterdam Breast Cancer Study                                                            | Netherlands | yes | yes |
| PBCS        | NCI Polish Breast Cancer Study                                                           | Poland      | yes | yes |
| SZBCS       | IHCC-Szczecin Breast Cancer Study                                                        | Poland      | yes | yes |
| HUBCS       | Hannover-Ufa Breast Cancer Study                                                         | Russia      | yes | yes |
| BREOGAN     | Breast Oncology Galicia Network                                                          | Spain       | yes | yes |
| HCSC        | Hospital Clinico San Carlos                                                              | Spain       | yes | no  |
| KARBAC      | Karolinska Breast Cancer Study                                                           | Sweden      | yes | no  |
| MISS        | Melanoma Inquiry of Southern Sweden                                                      | Sweden      | yes | yes |
| pKARMA      | Karolinska Mammography Project for Risk Prediction of Breast Cancer - Case-Control Study | Sweden      | yes | yes |
| SMC         | Swedish Mammography Cohort                                                               | Sweden      | yes | yes |
| BBCS        | British Breast Cancer Study                                                              | UK          | yes | yes |
| DIETCOMPLYF | DietCompLyf Breast Cancer Survival Study                                                 | UK          | yes | no  |
| POSH        | Prospective Study of Outcomes in Sporadic Versus Hereditary Breast Cancer                | UK          | yes | no  |
| SEARCH      | Study of Epidemiology and Risk factors in Cancer Heredity                                | UK          | yes | yes |
| UKBGS       | UK Breakthrough Generations Study                                                        | UK          | yes | yes |
| UKOPS       | UK Ovarian Cancer Population Study                                                       | UK          | no  | yes |
| 2SISTER     | The Two Sister Study                                                                     | USA         | yes | no  |
| BCFR-NY     | New York Breast Cancer Family Registry                                                   | USA         | yes | yes |
| BCFR-PA     | Philadelphia Breast Cancer Family Registry                                               | USA         | yes | no  |
| BCFR-UTAH   | Utah Breast Cancer Family Registry                                                       | USA         | yes | no  |
| CPSII       | Cancer Prevention Study-II Nutrition Cohort                                              | USA         | yes | yes |
| CTS         | California Teachers Study                                                                | USA         | yes | yes |
| MCBCS       | Mayo Clinic Breast Cancer Study                                                          | USA         | yes | yes |
| MEC         | Multiethnic Cohort                                                                       | USA         | yes | yes |
| MMHS        | Mayo Mammography Health Study                                                            | USA         | yes | yes |
| MSKCC       | Memorial Sloan-Kettering Cancer Center Study                                             | USA         | yes | no  |
| NBHS        | Nashville Breast Health Study                                                            | USA         | yes | yes |
| NC-BCFR     | Northern California Breast Cancer Family Registry                                        | USA         | yes | yes |
| NHS         | Nurses Health Study                                                                      | USA         | yes | yes |

|               |                                                                                 |                |            |            |
|---------------|---------------------------------------------------------------------------------|----------------|------------|------------|
| <i>NHS2</i>   | <i>Nurses Health Study 2</i>                                                    | <i>USA</i>     | <i>yes</i> | <i>yes</i> |
| <i>PLCO</i>   | <i>The Prostate, Lung, Colorectal and Ovarian (PLCO) Cancer Screening Trial</i> | <i>USA</i>     | <i>yes</i> | <i>yes</i> |
| <i>SISTER</i> | <i>The Sister Study</i>                                                         | <i>USA</i>     | <i>yes</i> | <i>yes</i> |
| <i>UCIBCS</i> | <i>UCI Breast Cancer Study</i>                                                  | <i>USA</i>     | <i>yes</i> | <i>yes</i> |
| <i>EPIC</i>   | <i>European Prospective Investigation Into Cancer and Nutrition (BPC3)</i>      | <i>Various</i> | <i>yes</i> | <i>yes</i> |
| <i>TNBCC</i>  | <i>Triple Negative Breast Cancer Consortium Study</i>                           | <i>Various</i> | <i>yes</i> | <i>no</i>  |

**Supplementary Table 3- Number of case subjects per country and study**

| Country   | BCAC Study | Number of cases             |  | CIMBA study  | Number of BRCA1 cases       | Number of BRCA2 cases       |
|-----------|------------|-----------------------------|--|--------------|-----------------------------|-----------------------------|
| Australia | MCCS       | 1051                        |  | NRG_ONCOLOGY | 1                           | 4                           |
|           | ABCTB      | 951                         |  | KCONFAB      | 368                         | 295                         |
|           | ABCFS      | 1087                        |  | BCFR-AU      | 25                          | 28                          |
|           | BCEES      | 783                         |  | VFCTG        | 103                         | 70                          |
|           |            | <b>Total : 3872 (6,42%)</b> |  |              | <b>Total : 497 (6,85%)</b>  | <b>Total : 397 (7,79%)</b>  |
| Belgium   | LMBC       | 789                         |  | G-FAST       | 121                         | 76                          |
|           |            | <b>Total : 789 (1,31%)</b>  |  |              | <b>Total : 121 (1,67%)</b>  | <b>Total : 76 (1,49%)</b>   |
| Canada    | CBCS       | 676                         |  | MCGILL       | 24                          | 14                          |
|           | OFBCR      | 1658                        |  | BCFR-ON      | 88                          | 60                          |
|           | MTLGEBCS   | 341                         |  | OCGN         | 71                          | 64                          |
|           |            |                             |  | INHERIT      | 37                          | 34                          |
|           |            | <b>Total : 2675 (4,43%)</b> |  |              | <b>Total : 220 (3,03%)</b>  | <b>Total : 172 (3,37%)</b>  |
| Denmark   | CGPS       | 1411                        |  | CBCS         | 76                          | 64                          |
|           |            |                             |  | OUH          | 191                         | 167                         |
|           |            | <b>Total : 1411 (2,34%)</b> |  |              | <b>Total : 267 (3,68%)</b>  | <b>Total : 231 (4,53%)</b>  |
| Finland   | HEBCS      | 281                         |  | HEBCS        | 53                          | 67                          |
|           | KBCP       | 556                         |  |              |                             |                             |
|           |            | <b>Total : 837 (1,39%)</b>  |  |              | <b>Total : 53 (0,73%)</b>   | <b>Total : 67 (1,31%)</b>   |
| France    | CECILE     | 306                         |  | GEMO         | 758                         | 563                         |
|           | EPIC       | 433                         |  |              |                             |                             |
|           |            | <b>Total : 739 (1,23%)</b>  |  |              | <b>Total : 758 (10,45%)</b> | <b>Total : 563 (11,04%)</b> |
| Germany   | ESTHER     | 296                         |  | GC-HBOC      | 1168                        | 646                         |
|           | SKKDKFZS   | 1091                        |  | DKFZ         | 36                          | 14                          |



|             |         |                              |  |              |                              |                             |
|-------------|---------|------------------------------|--|--------------|------------------------------|-----------------------------|
|             | GESBC   | 351                          |  |              |                              |                             |
|             | GENICA  | 460                          |  |              |                              |                             |
|             | BBCC    | 441                          |  |              |                              |                             |
|             | MARIE   | 512                          |  |              |                              |                             |
|             | BSUCH   | 269                          |  |              |                              |                             |
|             | EPIC    | 661                          |  |              |                              |                             |
|             | GC-HBOC | 3634                         |  |              |                              |                             |
|             | HABCS   | 929                          |  |              |                              |                             |
|             |         | <b>Total : 8644 (14,33%)</b> |  |              | <b>Total : 1204 (16,59%)</b> | <b>Total : 660 (12,95%)</b> |
| Greece      |         |                              |  |              |                              |                             |
|             | EPIC    | 182                          |  | DEMOKRITOS   | 132                          | 23                          |
|             | CCGP    | 670                          |  |              |                              |                             |
|             |         | <b>Total : 852 (1,41%)</b>   |  |              | <b>Total : 132 (1,82%)</b>   | <b>Total : 23 (0,45%)</b>   |
| Israel      |         |                              |  |              |                              |                             |
|             | BCINIS  | 1330                         |  | SMC          | 66                           | 33                          |
|             |         | <b>Total : 1330 (2,2%)</b>   |  |              | <b>Total : 66 (0,91%)</b>    | <b>Total : 33 (0,65%)</b>   |
| Italy       |         |                              |  |              |                              |                             |
|             | EPIC    | 822                          |  | CONSTIT TEAM | 271                          | 187                         |
|             | MBCSG   | 787                          |  | IOVHBOCS     | 109                          | 113                         |
|             |         |                              |  | PBCS         | 49                           | 6                           |
|             |         | <b>Total : 1609 (2,67%)</b>  |  |              | <b>Total : 429 (5,91%)</b>   | <b>Total : 306 (6%)</b>     |
| Netherlands |         |                              |  |              |                              |                             |
|             | RBCS    | 473                          |  | HEBON        | 374                          | 199                         |
|             | EPIC    | 709                          |  |              |                              |                             |
|             | ORIGO   | 1055                         |  |              |                              |                             |
|             | ABCS    | 267                          |  |              |                              |                             |
|             |         | <b>Total : 2504 (4,15%)</b>  |  |              | <b>Total : 374 (5,15%)</b>   | <b>Total : 199 (3,9%)</b>   |
| Poland      |         |                              |  |              |                              |                             |
|             | PBCS    | 1931                         |  | IHCC         | 77                           | 0                           |
|             | SZBCS   | 379                          |  |              |                              |                             |
|             |         | <b>Total : 2310 (3,83%)</b>  |  |              | <b>Total : 77 (1,06%)</b>    | <b>Total : 0 (0%)</b>       |
|             |         |                              |  |              |                              |                             |
|             |         |                              |  |              |                              |                             |

|        |             |                              |  |            |                             |                             |
|--------|-------------|------------------------------|--|------------|-----------------------------|-----------------------------|
| Russia | HUBCS       | 211                          |  | BIDMC      | 1                           | 0                           |
|        |             |                              |  | NNPIO      | 44                          | 2                           |
|        |             | <b>Total : 211 (0,35%)</b>   |  |            | <b>Total : 45 (0,62%)</b>   | <b>Total : 2 (0,04%)</b>    |
| Spain  | BREOGAN     | 1376                         |  | HCSC       | 56                          | 76                          |
|        | EPIC        | 337                          |  | ICO        | 130                         | 185                         |
|        | HCSC        | 426                          |  | HVH        | 62                          | 63                          |
|        |             |                              |  | FPGMX      | 67                          | 44                          |
|        |             |                              |  | CNIO       | 31                          | 33                          |
|        |             |                              |  | iovhbocs   | 1                           | 0                           |
|        |             | <b>Total : 2139 (3,55%)</b>  |  |            | <b>Total : 347 (4,78%)</b>  | <b>Total : 401 (7,87%)</b>  |
| Sweden | SMC         | 1504                         |  | SWE-BRCA   | 190                         | 25                          |
|        | KARBAC      | 497                          |  |            |                             |                             |
|        | MISS        | 697                          |  |            |                             |                             |
|        | PKARMA      | 2991                         |  |            |                             |                             |
|        |             | <b>Total : 5689 (9,43%)</b>  |  |            | <b>Total : 190 (2,62%)</b>  | <b>Total : 25 (0,49%)</b>   |
| UK     | UKBGS       | 1632                         |  | OUH        | 1                           | 0                           |
|        | SEARCH      | 4057                         |  | EMBRACE    | 795                         | 768                         |
|        | POSH        | 1088                         |  | UKGRFOCR   | 13                          | 4                           |
|        | DIETCOMPLYF | 711                          |  |            |                             |                             |
|        | BBCS        | 122                          |  |            |                             |                             |
|        | EPIC        | 703                          |  |            |                             |                             |
|        |             | <b>Total : 8313 (13,78%)</b> |  |            | <b>Total : 809 (11,15%)</b> | <b>Total : 772 (15,14%)</b> |
| USA    | UCIBCS      | 490                          |  | BIDMC      | 43                          | 24                          |
|        | SISTER      | 2016                         |  | FCCC       | 26                          | 11                          |
|        | MEC         | 672                          |  | UTMDACC    | 25                          | 39                          |
|        | CTS         | 1156                         |  | NORTHSHORE | 40                          | 19                          |
|        | NHS2        | 1606                         |  | DFCI       | 65                          | 46                          |
|        | NBHS        | 677                          |  | BRICOH     | 52                          | 48                          |
|        | MCBCS       | 925                          |  | WCP        | 51                          | 18                          |

|  |           |                               |  |              |                              |                              |
|--|-----------|-------------------------------|--|--------------|------------------------------|------------------------------|
|  | PLCO      | 868                           |  | NRG_ONCOLOGY | 165                          | 141                          |
|  | CPSII     | 3054                          |  | OSU CCG      | 50                           | 56                           |
|  | BCFR-PA   | 132                           |  | KUMC         | 24                           | 12                           |
|  | MSKCC     | 120                           |  | UCSF         | 33                           | 28                           |
|  | 2SISTER   | 1071                          |  | GEMO         | 84                           | 25                           |
|  | NHS       | 1590                          |  | BCFR-NC      | 33                           | 22                           |
|  | BCFR-UTAH | 102                           |  | GEORGETOWN   | 5                            | 0                            |
|  | NC-BCFR   | 712                           |  | MAYO         | 122                          | 74                           |
|  | BCFR-NY   | 454                           |  | BCFR-PA      | 18                           | 3                            |
|  | TNBCC     | 373                           |  | NCI          | 42                           | 21                           |
|  | MMHS      | 384                           |  | COH          | 141                          | 98                           |
|  |           |                               |  | BCFR-NY      | 37                           | 25                           |
|  |           |                               |  | UPENN        | 240                          | 168                          |
|  |           |                               |  | MSKCC        | 185                          | 167                          |
|  |           |                               |  | BCFR-UT      | 67                           | 54                           |
|  |           |                               |  | UCHICAGO     | 43                           | 29                           |
|  |           |                               |  | UPITT        | 77                           | 43                           |
|  |           | <b>Total : 16402 (27,19%)</b> |  |              | <b>Total : 1668 (22,98%)</b> | <b>Total : 1171 (22,97%)</b> |
|  |           | <b>Total : 60326</b>          |  |              | <b>Total : 7258</b>          | <b>Total : 5100</b>          |

**Supplementary Table 4- Number of control subjects per country and study**

| Country   | BCAC Study | Number of controls          |  | CIMBA study  | Number of BRCA1 controls   | Number of BRCA2 controls   |
|-----------|------------|-----------------------------|--|--------------|----------------------------|----------------------------|
| Australia | MCCS       | 978                         |  | NRG_ONCOLOGY | 3                          | 6                          |
|           | ABCTB      | 374                         |  | KCONFAB      | 356                        | 273                        |
|           | ABCFS      | 189                         |  | BCFR-AU      | 14                         | 11                         |
|           | BCEES      | 835                         |  | VFCTG        | 104                        | 130                        |
|           |            | <b>Total : 2376 (5,18%)</b> |  |              | <b>Total : 477 (6,64%)</b> | <b>Total : 420 (8,32%)</b> |
| Belgium   | LMBC       | 1268                        |  | G-FAST       | 69                         | 87                         |
|           |            | <b>Total : 1268 (2,76%)</b> |  |              | <b>Total : 69 (0,96%)</b>  | <b>Total : 87 (1,72%)</b>  |
| Canada    | CBCS       | 817                         |  | MCGILL       | 30                         | 20                         |
|           | OFBCR      | 375                         |  | BCFR-ON      | 34                         | 24                         |
|           | MTLGBCS    | 169                         |  | OCGN         | 133                        | 107                        |
|           |            |                             |  | INHERIT      | 52                         | 46                         |
|           |            | <b>Total : 1361 (2,97%)</b> |  |              | <b>Total : 249 (3,47%)</b> | <b>Total : 197 (3,9%)</b>  |
| Denmark   | CGPS       | 716                         |  | CBCS         | 111                        | 65                         |
|           |            |                             |  | OUH          | 357                        | 258                        |
|           |            | <b>Total : 716 (1,56%)</b>  |  |              | <b>Total : 468 (6,51%)</b> | <b>Total : 323 (6,4%)</b>  |
| Finland   | HEBCS      | 177                         |  | HEBCS        | 67                         | 63                         |
|           | KBCP       | 245                         |  | OUH          | 1                          | 0                          |
|           |            | <b>Total : 422 (0,92%)</b>  |  |              | <b>Total : 68 (0,95%)</b>  | <b>Total : 63 (1,25%)</b>  |
| France    | CECILE     | 159                         |  | GEMO         | 558                        | 314                        |
|           | EPIC       | 370                         |  |              |                            |                            |
|           |            | <b>Total : 529 (1,15%)</b>  |  |              | <b>Total : 558 (7,77%)</b> | <b>Total : 314 (6,22%)</b> |
| Germany   | ESTHER     | 187                         |  | GC-HBOC      | 675                        | 407                        |
|           | SKKDKFZS   | 0                           |  | DKFZ         | 19                         | 10                         |
|           | GESBC      | 181                         |  |              |                            |                            |

|             |         |                             |  |              |                            |                            |
|-------------|---------|-----------------------------|--|--------------|----------------------------|----------------------------|
|             | GENICA  | 284                         |  |              |                            |                            |
|             | BBCC    | 253                         |  |              |                            |                            |
|             | MARIE   | 289                         |  |              |                            |                            |
|             | BSUCH   | 168                         |  |              |                            |                            |
|             | EPIC    | 650                         |  |              |                            |                            |
|             | GC-HBOC | 1593                        |  |              |                            |                            |
|             | HABCS   | 866                         |  |              |                            |                            |
|             |         | <b>Total : 4471 (9,74%)</b> |  |              | <b>Total : 694 (9,66%)</b> | <b>Total : 417 (8,26%)</b> |
| Greece      | EPIC    | 180                         |  | DEMOKRITOS   | 85                         | 9                          |
|             | CCGP    | 332                         |  |              |                            |                            |
|             |         | <b>Total : 512 (1,12%)</b>  |  |              | <b>Total : 85 (1,18%)</b>  | <b>Total : 9 (0,18%)</b>   |
| Israel      | BCINIS  | 713                         |  | SMC          | 99                         | 47                         |
|             |         | <b>Total : 713 (1,55%)</b>  |  |              | <b>Total : 99 (1,38%)</b>  | <b>Total : 47 (0,93%)</b>  |
| Italy       | EPIC    | 788                         |  | CONSTIT TEAM | 265                        | 127                        |
|             | MBCSG   | 366                         |  | IOVHBOCS     | 92                         | 53                         |
|             |         |                             |  | PBCS         | 39                         | 1                          |
|             |         | <b>Total : 1154 (2,51%)</b> |  |              | <b>Total : 396 (5,51%)</b> | <b>Total : 181 (3,59%)</b> |
| Netherlands | RBCS    | 240                         |  | HEBON        | 491                        | 401                        |
|             | EPIC    | 676                         |  |              |                            |                            |
|             | ORIGO   | 660                         |  |              |                            |                            |
|             | ABCS    | 189                         |  |              |                            |                            |
|             |         | <b>Total : 1765 (3,85%)</b> |  |              | <b>Total : 491 (6,83%)</b> | <b>Total : 401 (7,95%)</b> |
| Poland      | PBCS    | 2045                        |  | IHCC         | 121                        | 0                          |
|             | SZBCS   | 174                         |  |              |                            |                            |
|             |         | <b>Total : 2219 (4,84%)</b> |  |              | <b>Total : 121 (1,68%)</b> | <b>Total : 0 (0%)</b>      |
| Russia      | HUBCS   | 119                         |  | NNPIO        | 22                         | 0                          |
|             |         | <b>Total : 119 (0,26%)</b>  |  |              | <b>Total : 22 (0,31%)</b>  | <b>Total : 0 (0%)</b>      |

|        |                 |                              |  |              |                             |                             |
|--------|-----------------|------------------------------|--|--------------|-----------------------------|-----------------------------|
| Spain  | BREOGAN         | 725                          |  | HCSC         | 85                          | 77                          |
|        | EPIC            | 311                          |  | ICO          | 150                         | 163                         |
|        | HCSC            | 0                            |  | HVH          | 56                          | 65                          |
|        |                 |                              |  | FPGMX        | 41                          | 0                           |
|        |                 |                              |  | CNIO         | 32                          | 31                          |
|        |                 |                              |  | IOVHBOCS     | 0                           | 26                          |
|        |                 | <b>Total : 1036 (2,26%)</b>  |  |              | <b>Total : 364 (5,07%)</b>  | <b>Total : 362 (7,17%)</b>  |
| Sweden | SMC             | 709                          |  | SWE-BRCA     | 237                         | 39                          |
|        | KARBAC          | 0                            |  |              |                             |                             |
|        | MISS            | 1545                         |  |              |                             |                             |
|        | PKARMA          | 6084                         |  |              |                             |                             |
|        |                 | <b>Total : 8338 (18,17%)</b> |  |              | <b>Total : 237 (3,3%)</b>   | <b>Total : 39 (0,77%)</b>   |
| UK     | UKBGS           | 705                          |  | EMBRACE      | 908                         | 867                         |
|        | SEARCH          | 2670                         |  | UKGRFOCR     | 40                          | 12                          |
|        | POSH            | 0                            |  | VFCTG        | 0                           | 1                           |
|        | DIETCOMPLY<br>F | 0                            |  |              |                             |                             |
|        | BBCS            | 442                          |  |              |                             |                             |
|        | EPIC            | 669                          |  |              |                             |                             |
|        | UKOPS           | 974                          |  |              |                             |                             |
|        |                 | <b>Total : 5460 (11,9%)</b>  |  |              | <b>Total : 948 (13,19%)</b> | <b>Total : 880 (17,44%)</b> |
| USA    | UCIBCS          | 258                          |  | BIDMC        | 40                          | 28                          |
|        | SISTER          | 1558                         |  | FCCC         | 49                          | 31                          |
|        | MEC             | 724                          |  | UTMDACC      | 18                          | 28                          |
|        | CTS             | 610                          |  | NORTHSHORE   | 40                          | 36                          |
|        | NHS2            | 1905                         |  | DFCI         | 80                          | 81                          |
|        | NBHS            | 652                          |  | BRICOH       | 98                          | 76                          |
|        | MCBCS           | 221                          |  | WCP          | 137                         | 51                          |
|        | PLCO            | 858                          |  | NRG_ONCOLOGY | 150                         | 141                         |

|  |           |                               |  |            |                              |                              |
|--|-----------|-------------------------------|--|------------|------------------------------|------------------------------|
|  | CPSII     | 3029                          |  | OSU CCG    | 34                           | 43                           |
|  | BCFR-PA   | 0                             |  | KUMC       | 3                            | 0                            |
|  | MSKCC     | 0                             |  | UCSF       | 60                           | 35                           |
|  | 2SISTER   | 0                             |  | GEMO       | 72                           | 14                           |
|  | NHS       | 1804                          |  | BCFR-NC    | 4                            | 5                            |
|  | BCFR-UTAH | 0                             |  | GEORGETOWN | 6                            | 0                            |
|  | NC-BCFR   | 148                           |  | MAYO       | 127                          | 54                           |
|  | BCFR-NY   | 27                            |  | BCFR-PA    | 26                           | 3                            |
|  | TNBCC     | 0                             |  | NCI        | 109                          | 62                           |
|  | MMHS      | 1635                          |  | COH        | 84                           | 43                           |
|  |           |                               |  | BCFR-NY    | 25                           | 27                           |
|  |           |                               |  | UPENN      | 220                          | 178                          |
|  |           |                               |  | MSKCC      | 194                          | 189                          |
|  |           |                               |  | BCFR-UT    | 135                          | 97                           |
|  |           |                               |  | UCHICAGO   | 51                           | 28                           |
|  |           |                               |  | UPITT      | 77                           | 56                           |
|  |           | <b>Total : 13429 (29,26%)</b> |  |            | <b>Total : 1839 (25,59%)</b> | <b>Total : 1306 (25,88%)</b> |
|  |           |                               |  |            |                              |                              |
|  |           | Total : 45888                 |  |            | Total : 7185                 | Total : 5046                 |

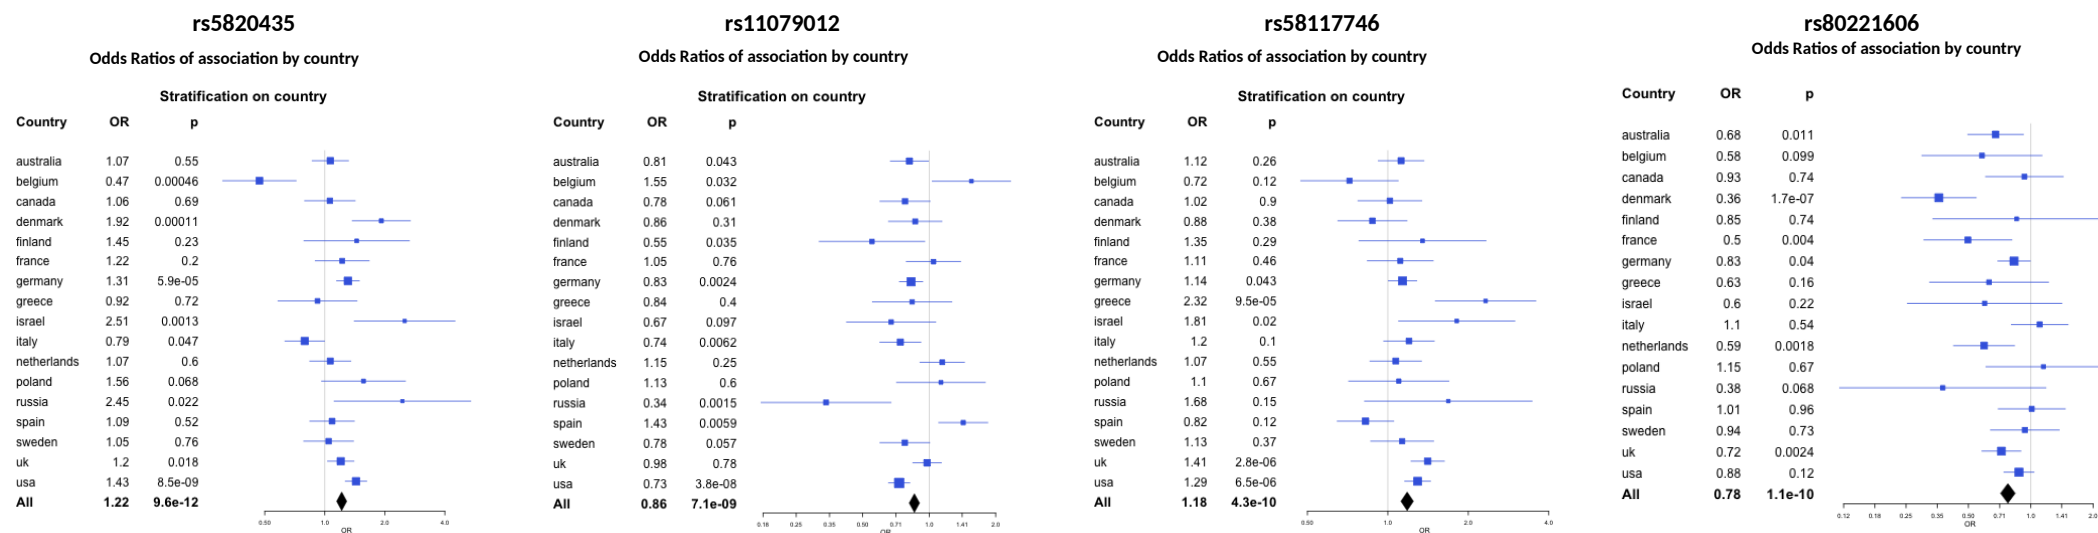

**Supplementary figure 1- Heterogeneity in the SNP associations by country for the SNPs found to be associated with BRCA1 mutation status.** Forest plots show the OR estimates in the case-only regression analysis by country. The Likelihood ratio test for heterogeneity between countries was significant at  $p < 0.05$  for all SNPs. OR values were computed from a two sided logistic regression using a 1df lrtest adjusted for age at BC diagnosis and the first four principal components. Data are presented as punctual OR values and confidence interval. Number of individuals included for each country is detailed in Supplementary table 3. Source data are provided as a Source Data file.



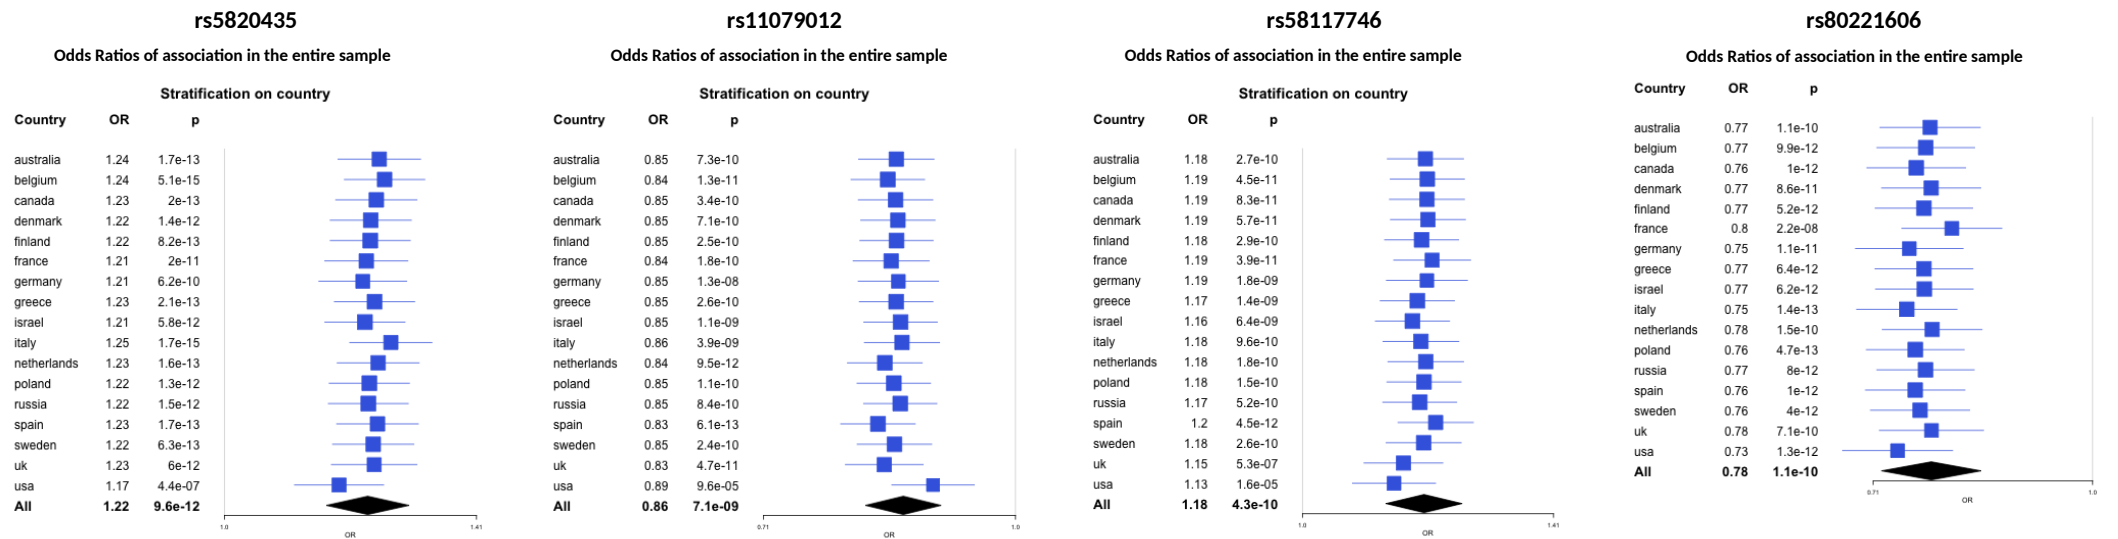

**Supplementary figure 2- Sensitivity analysis for the SNPs showing associations with *BRCA1* mutation status in the case only analysis.** Forest plots show the OR estimates of association in the entire sample after excluding each country in turn. “Country” indicates the country excluded in the analysis. OR values were computed from a two sided logistic regression using a 1df Irtest adjusted for age at BC diagnosis and the first four principal components. Data are presented as punctual OR values and confidence interval. Source data are provided as a Source Data file.

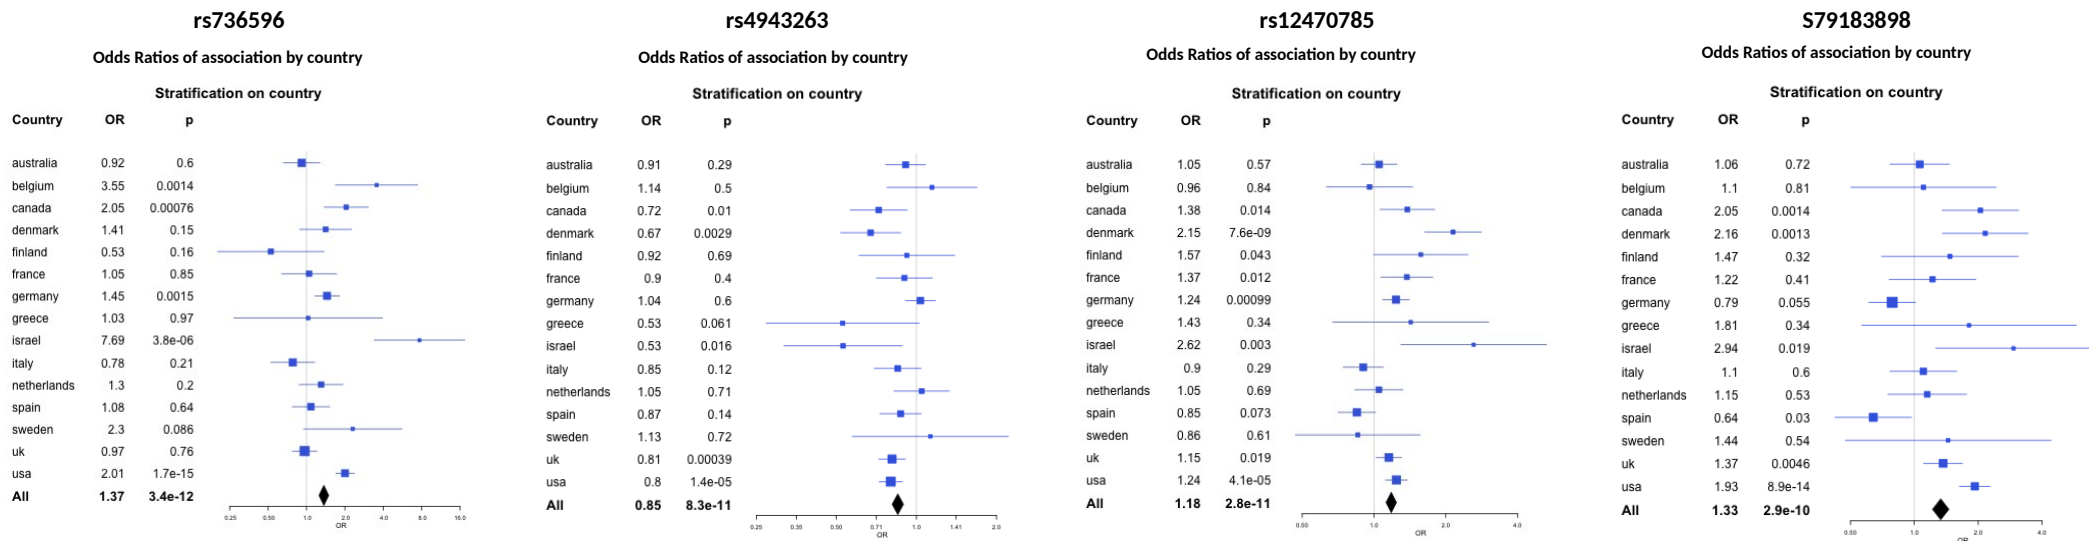

**Supplementary figure 3- Heterogeneity in the SNP associations by country for the SNPs found to be associated with BRCA2 mutation status.** Forest plots show the OR estimates in the case-only regression analysis by country. The Likelihood ratio test for heterogeneity between countries was significant at  $p < 0.05$  for all SNPs. OR values were computed from a two sided logistic regression using a 1df lrtest adjusted for age at BC diagnosis and the first four principal components. Data are presented as punctual OR values and confidence interval. Source data are provided as a Source Data file.

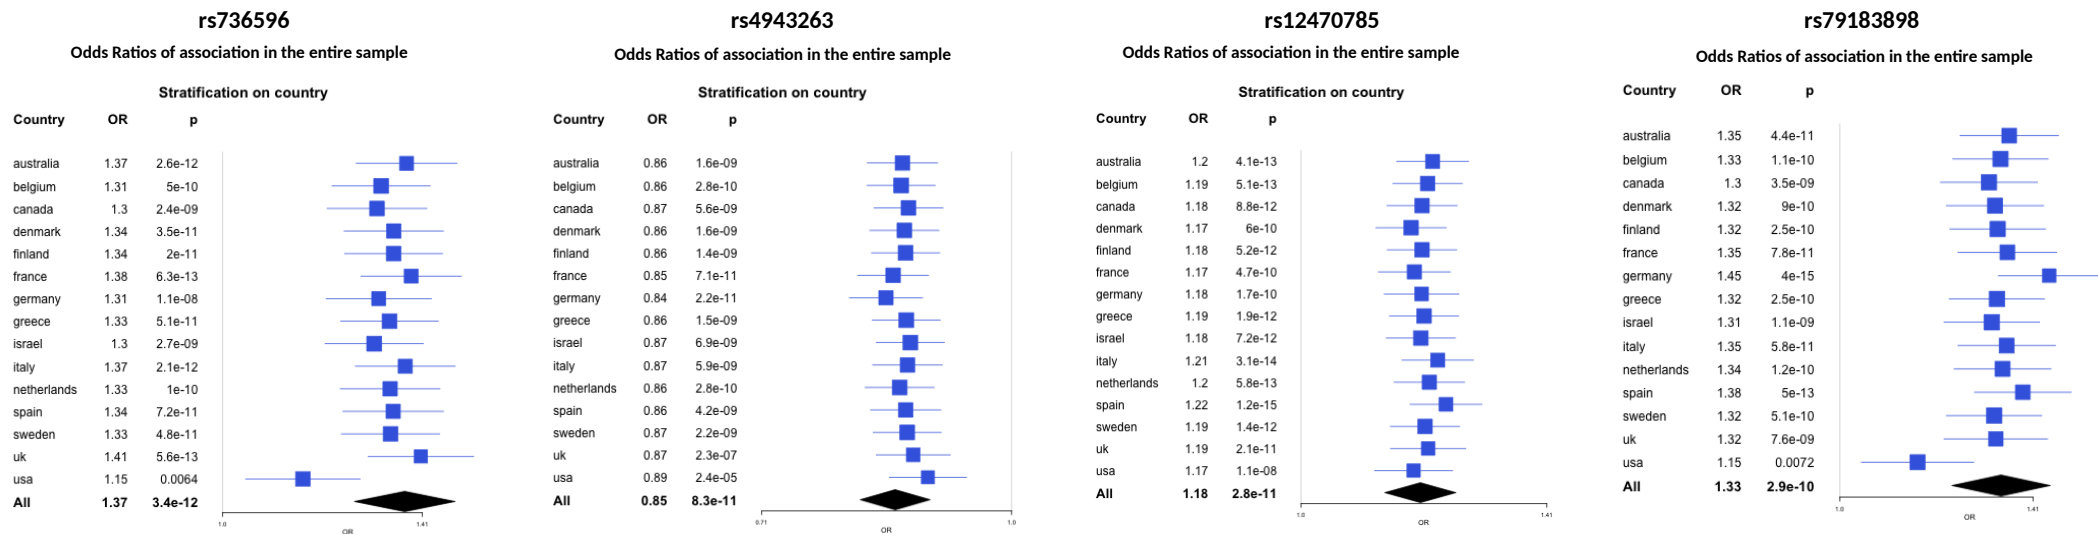

**Supplementary figure 4- Sensitivity analysis for the SNPs showing associations with *BRCA2* mutation status in the case only analysis.** Forest plots show the OR estimates of association in the entire sample after excluding each country in turn. “Country” indicates the country excluded in the analysis. OR values were computed from a two sided logistic regression using a 1df lrtest adjusted for age at BC diagnosis and the first four principal components. Data are presented as punctual OR values and confidence interval. Source data are provided as a Source Data file.

**a.**

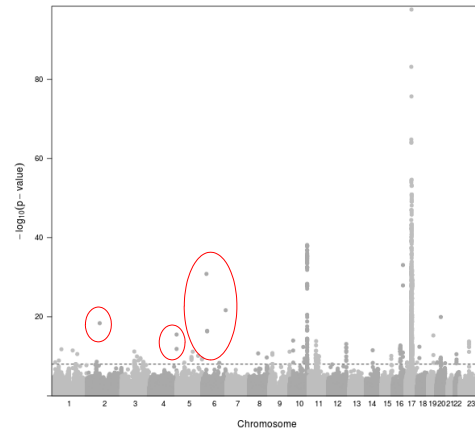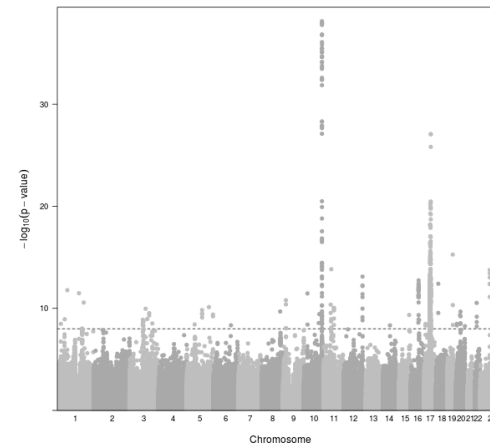

**b.**

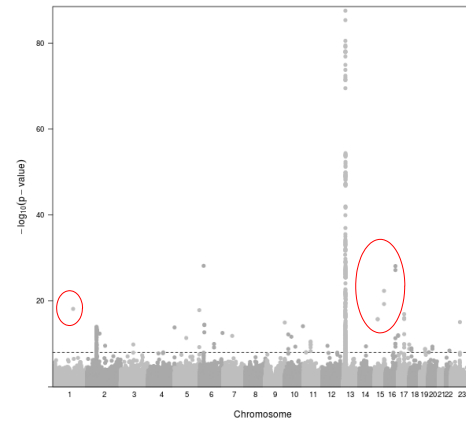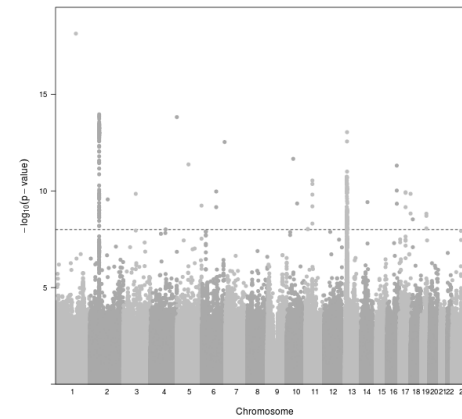

### Supplementary figure 5- Impact of the control-only analysis on the case-only analysis results

Manhattan plot showing  $-\log_{10}(P\text{-value})$  for the case-only analysis of SNPs before exclusion of the significant SNPs (i.e. in LD or ILD) in the control-only analysis (left) and after exclusions of significant SNPs in the control-only analysis (right) for **a.** *BRCA1* mutation carriers,  $N = 67,469$  breast cancer cases (60,212 BCAC cases and 7,257 *BRCA1* mutation carrier cases) and **b.** *BRCA2* mutation carriers,  $N = 62,822$  breast cancer cases (57,725 BCAC cases and 5,097 *BRCA2* mutation carrier cases). In red circles, example of SNPs excluded based on control analysis and significantly associated in case-only analysis. Grey dotted line represents the multiple testing threshold,  $\alpha^* = 10^{-8}$ . OR values were computed from a two sided logistic regression using a 1df lrttest adjusted for age at BC diagnosis, country and the first four principal components. Source data are provided as a Source Data file.
