# Supplementary material for: A case-only study to identify genetic modifiers of breast cancer risk for BRCA1/BRCA2 mutation carriers
Source: PubMed Central journal article supplement (PMC7890067; doi:10.1038/s41467-020-20496-3), 2021-02-17
Supplement: 41467_2020_20496_MOESM3_ESM.pdf [file 41467_2020_20496_MOESM3_ESM.pdf]

## **Description of Additional Supplementary Files**

File name: Supplementary data 1

Description: SNPs previously found to be associated with breast cancer risk in Michailidou et Al. (2017): results from the case-only analyses comparing all BCAC cases or BCAC ER-negative breast cancer cases with BRCA1 breast cancer cases.

File name: Supplementary data 2

Description: SNPs previously found to be associated with breast cancer risk in Milne et Al. (2017): results from the case-only analyses comparing all BCAC cases or BCAC ER-negative breast cancer cases with BRCA1 breast cancer cases. (2017)

File name: Supplementary data 3

Description: SNPs previously found to be associated with breast cancer risk in Michailidou et Al. (2017): results from the case-only analyses comparing all BCAC cases or BCAC ER-negative breast cancer cases with BRCA2 breast cancer cases.

File name: Supplementary data 4

Description: 71 SNPs associated in the case-only analysis for BRCA1 mutation carriers (after re-imputation and before step-wise regression).

File name: Supplementary data 5

Description: 102 SNPs associated in the case-only analysis for BRCA2 mutation carriers (after re-imputation and before step-wise regression).

File name: Supplementary data 6

Description: Credible causal variants in the case-only analysis for BRCA1 mutation carriers.

File name: Supplementary data 7

Description: INQUISIT results for CCV found in the case-only analysis for BRCA1 mutation carriers.

File name: Supplementary data 8

Description: 395 credible causal variants in the case-only analysis for BRCA2 mutation carriers.

File name: Supplementary data 9

Description: INQUISIT results for CCV found in the case-only analysis for BRCA2 mutation carriers.
